# Supplementary material for: Aromatic ring size effects on the photophysics and photochemistry of styrylbenzothiazole
Source: Royal Society of Chemistry journal article supplement (doi:10.1039/c3pp25367h), 2013-05-08
Supplement: c3pp25367h.pdf [file c3pp25367h.pdf]

## Supplementary information

### **Aromatic Ring Size Effect on the Photophysics and Photochemistry of Styrylbenzothiazoles**

Mohammed K. Awad<sup>†</sup>, Morad M. El-Hendawy,<sup>†‡</sup> Tarek A. Fayed,<sup>†</sup> Safaa H. Etio,<sup>†</sup> Niall  
J. English<sup>‡</sup>

<sup>†</sup> *Chemistry Department, Faculty of Science, Tanta University, Tanta, EGYPT*

<sup>‡</sup> *The SFI Strategic Research Cluster in Solar Energy Conversion and the Centre for  
Synthesis and Chemical Biology, School of Chemical and Bioprocess Engineering,  
University College Dublin, Belfield, Dublin 4, Ireland*

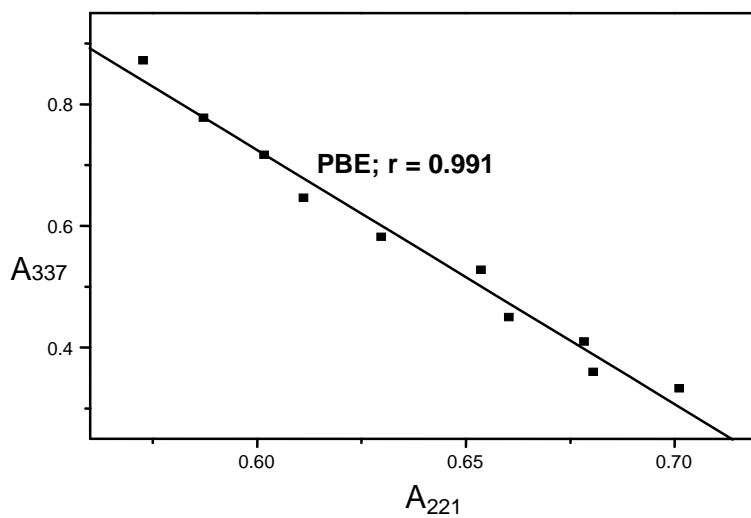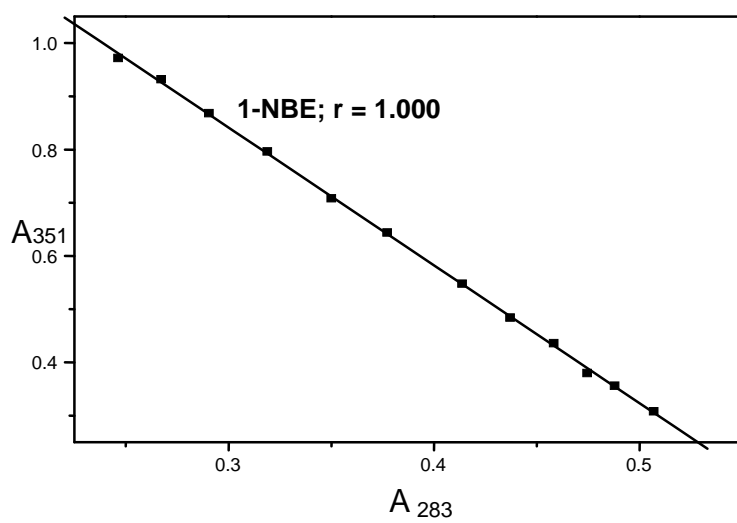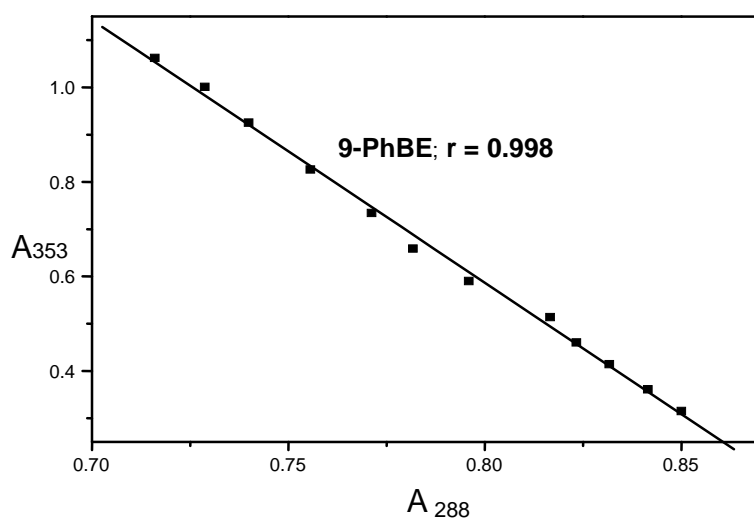

Fig. S1. Demonstration of linear correlation between the monitored absorbance changes between the two maxima (cisiod region and lower frequency region of the absorption spectra) of PBE, 1-NBE and 9-PhBE in MeCN, measured immediately after irradiation at 334 nm for definite time intervals as presented on Fig. 5.

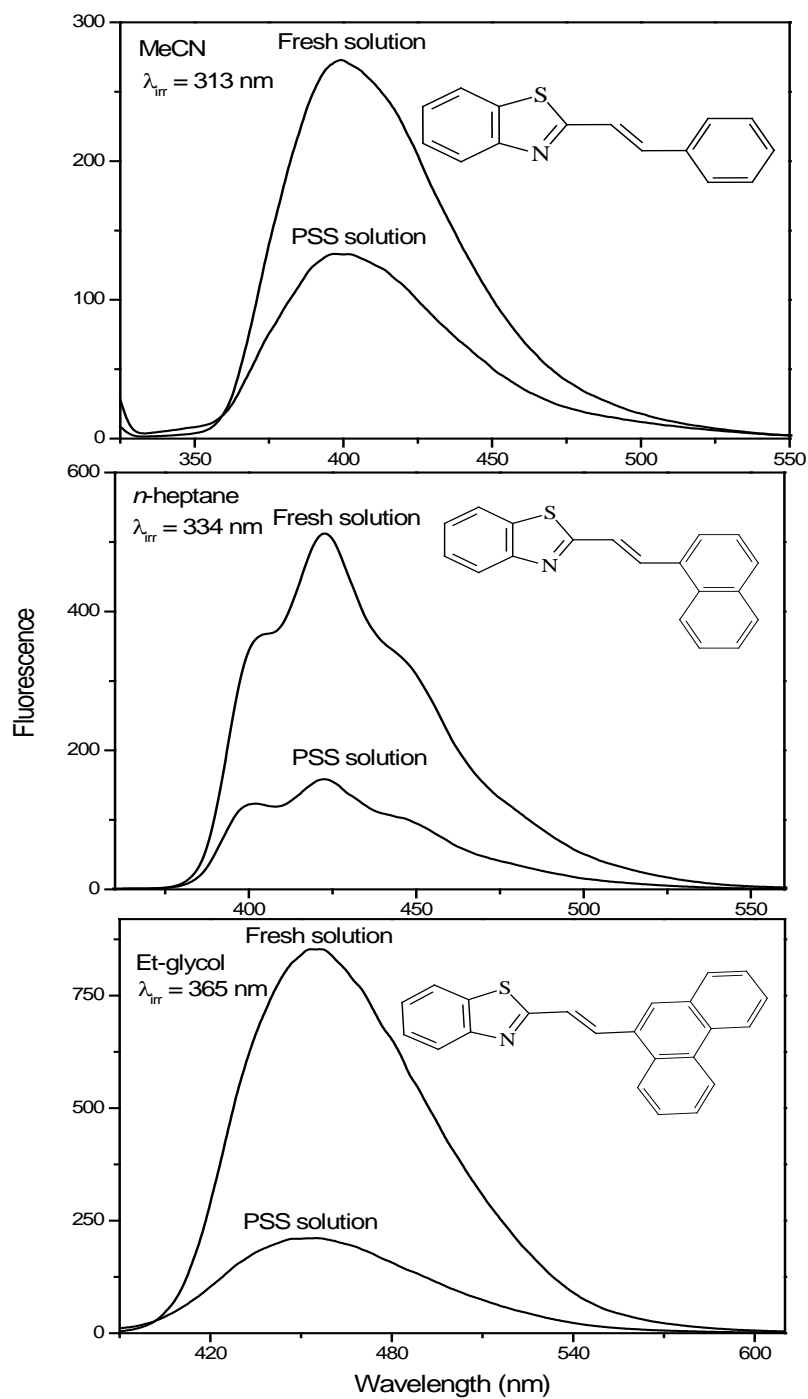

Fig. S2. Fluorescence spectra recorded before irradiation and at the photo-stationary state for PBE, 1-NBE and 9-PhBE.

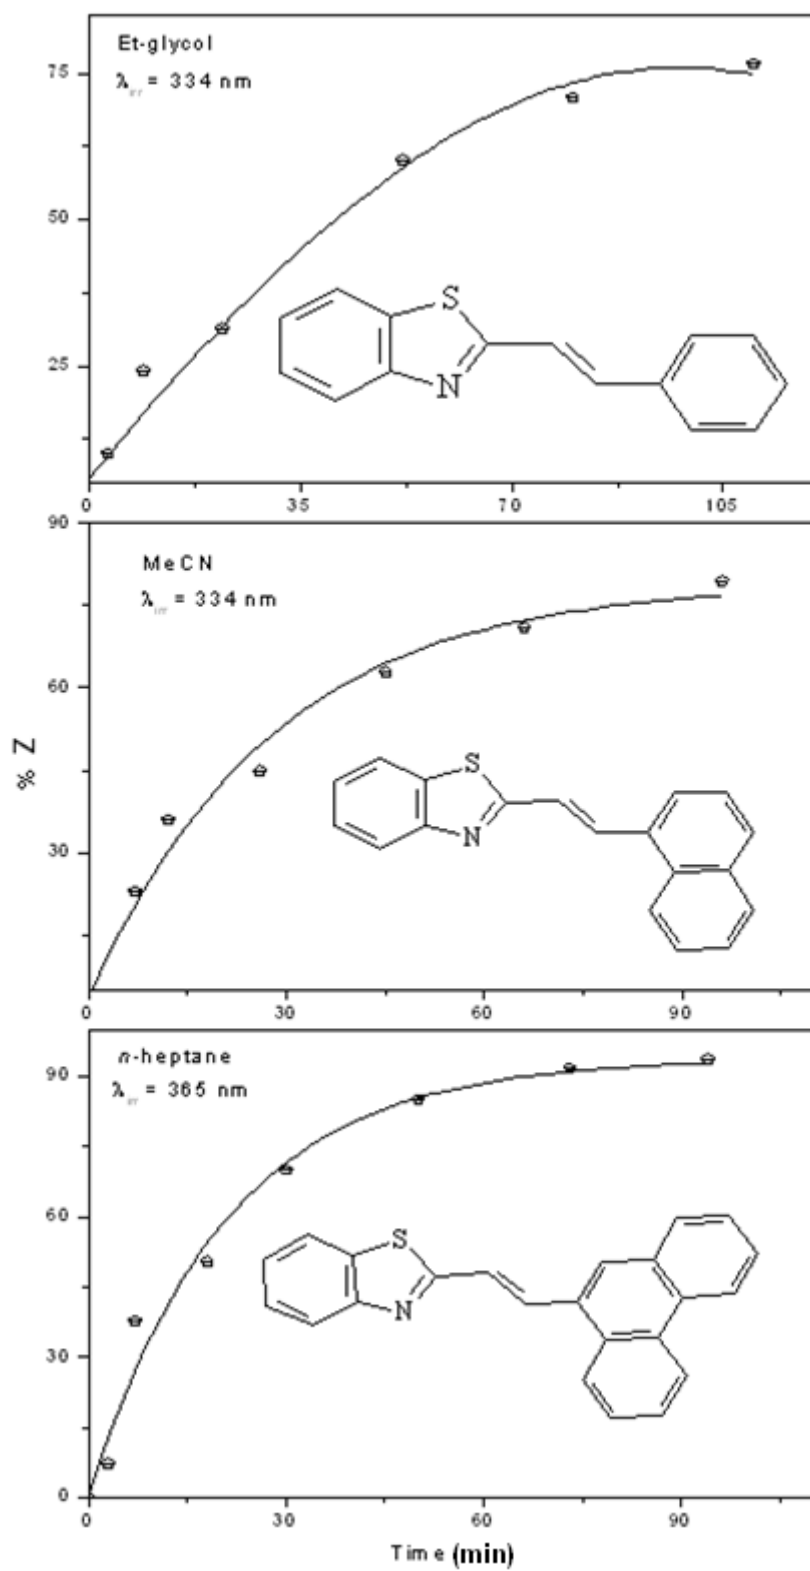

Fig. S3. Growth of the percentage of Z-isomer (% Z) of PBE, 1-NBE and 9-PhBE versus irradiation time.
